# Supplementary material for: Desulfurization mechanism of thioether compounds in heavy oil on the (111) surface of inverse spinel Fe3O4
Source: Royal Society of Chemistry journal article supplement (doi:10.1039/d2cp02135h), 2022-01-01
Supplement: d2cp02135h1.pdf [file d2cp02135h1.pdf]

## Desulfurization Mechanism of Thioether Compounds in Heavy Oil on the (111) Surface of Inverse Spinel $\text{Fe}_3\text{O}_4$

Chen Li<sup>1, 2\*</sup>, Mengmeng Zhao<sup>1</sup>, Xing Wang<sup>1</sup>, Zheng Fang<sup>1</sup>, Yanling Chen<sup>2</sup>, Haifeng Bao<sup>1\*</sup>

1. School of Materials Science and Engineering, State Key Laboratory of New Textile Materials & Advanced Processing Technology, Wuhan Textile University, 1 Jiangxia Road, Wuhan 430200, China

2. Faculty of Materials Science and Chemistry, China University of Geosciences, 388 Lumo Road, Wuhan 430074, China

Correspondence: cli@wtu.edu.cn (C. Li), baohaifeng@wtu.edu.cn (H. Bao)

### $\text{Fe}_3\text{O}_4$ preparation:

2 mmol of  $\text{Fe}(\text{NO}_3)_3 \cdot 9\text{H}_2\text{O}$  was dissolved in 50 mL of ethylene glycol under ultrasonic treatment for 20 min to ensure the solid was it fully dissolved completely. Then, pre-configured NaOH solution (6 mol/L) was added to  $\text{Fe}(\text{NO}_3)_3$  solution drop by drop to adjust pH to 9-10. After the solution was stirred evenly, it was transferred to a PTFE liner in a stainless-steel reactor at  $180^\circ\text{C}$  for 24 h. After the reaction, the mixture was transferred to a large beaker and washed with distilled water until the upper clear liquid was neutral. Furthermore, the precipitation ( $\text{Fe}_3\text{O}_4$ ) was separated and dried overnight under vacuum. Finally, the sample was ground for use.

**Figure S1**

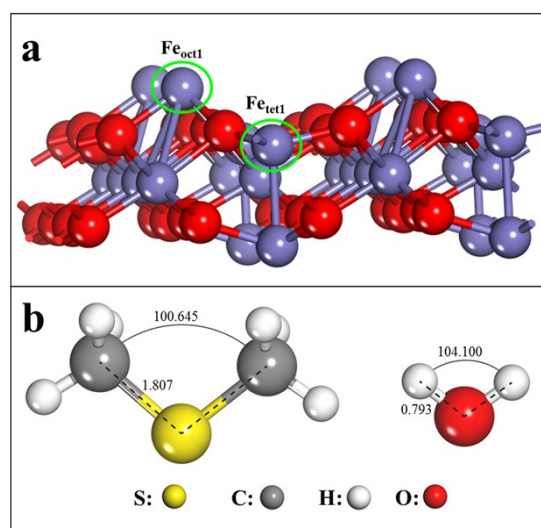

**Figure S1** Structure of optimized  $\text{Fe}_3\text{O}_4$  unit cell, dimethyl sulfide and water molecule models

**Figure S2**

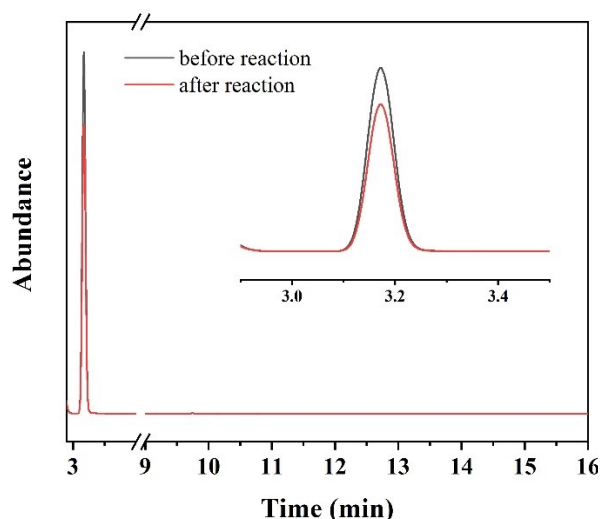

**Figure S2** GC-MS spectra of reaction system before and after catalytic reaction; inset shows the amplification of  $C_2H_6SC_2H_6$  species.

Referring to the rate-determining step of C-S bond decomposition in thioethers, we simulated the first step of C-S bond dissociation in  $C_4H_8S$  and  $C_4H_4S$  to compare the catalytic mechanism of different S-containing compounds during aquathermolysis, of which the calculated results were illustrated in **Figure S3** and **Figure S4**. Under attack of free  $H_2O$ , C-S bond length in  $C_4H_8S$  was enlarged to 1.857 Å from 1.837 Å, meanwhile, the O-H in  $H_2O$  was extended to 0.982 Å. As the reaction advanced, C-S bond and O-H bond were destroyed, producing final  $HSC_4H_8OH$  with S atom and O atom anchored to two nearby Fe atoms. The reaction barrier was 0.779 eV, higher than that of  $CH_3SCH_3$ , which should be mainly resulted from the interspace resistance caused by its cyclic structure. Simultaneously, the reaction energy was 0.203 eV indicating an endothermic reaction, high than that of  $CH_3SCH_3$ , which should also be relevant to the interspace resistance of the molecule.

Analogously, with respect to  $C_4H_8S$ , the existence of  $H_2O$  also enlarged the length of C-S bond (1.714 Å→1.736 Å), meanwhile, the O-H bond was extended to 0.977 Å. As the reaction advanced, C-S bond and O-H bond were broken down, with the S atom and O atom in the final  $HSC_4H_4OH$  product absorbed to two contiguous Fe atoms. The corresponding activate energy and reaction heat were 1.995 eV and 0.584 eV, higher than  $C_4H_8S$  and  $CH_3SCH_3$ , which was not only because of the ring structure but the conjugated electrons in the molecule. Herein, the dissociation activity of different S-containing compound followed the trend of straight-chain saturated thioethers > thiophanes > thiophenes could be concluded.

**Figure S3**

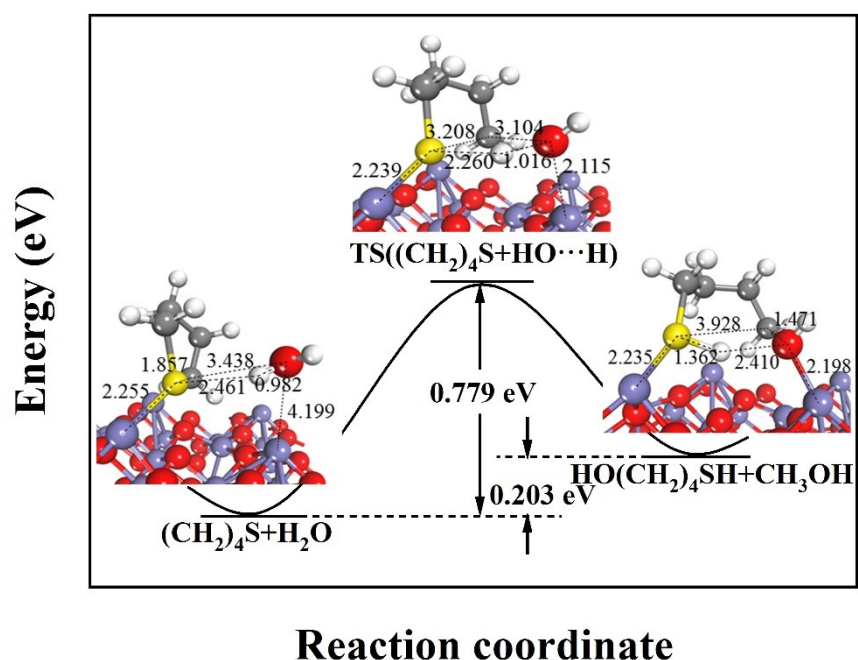

**Figure S3** The structure and energy variety of optimized  $\text{Fe}_3\text{O}_4$  (111) and  $\text{C}_4\text{H}_8\text{S}$  during catalytic reaction with assistance of free  $\text{H}_2\text{O}$  molecule

**Figure S4**

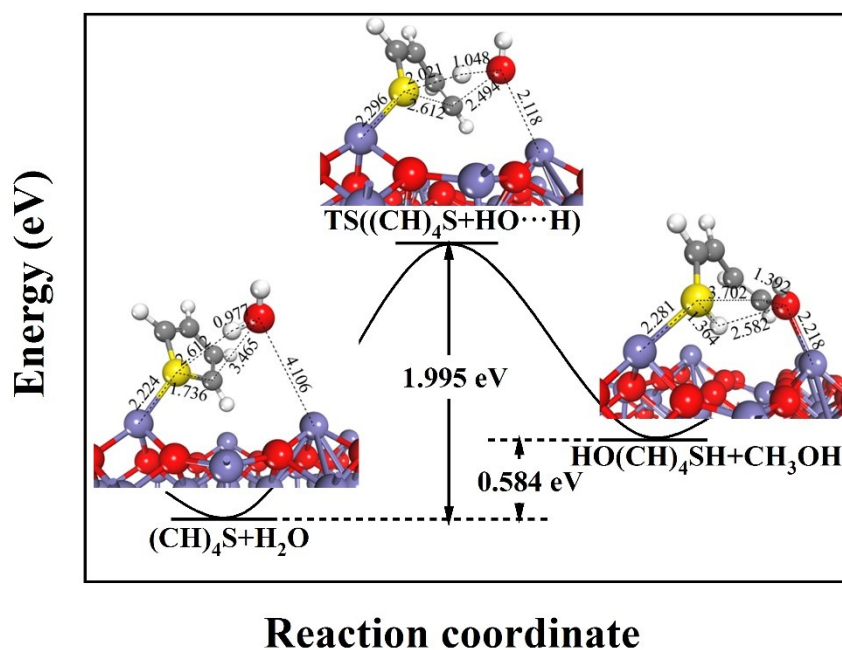

**Figure S4** The structure and energy variety of optimized  $\text{Fe}_3\text{O}_4$  (111) and  $\text{C}_4\text{H}_4\text{S}$  during catalytic reaction with assistance of free  $\text{H}_2\text{O}$  molecule

According to optimized catalytic test condition (30%  $\text{H}_2\text{O}$ , 200°C/12 h), the decomposition results of  $\text{C}_4\text{H}_8\text{SH}$ ,  $\text{C}_4\text{H}_8\text{S}$ ,  $\text{C}_4\text{H}_4\text{S}$  were illustrated in **Figure S5**. After reaction, the decrease of  $\text{C}_4\text{H}_8\text{SH}$  and  $\text{C}_4\text{H}_8\text{S}$  model was 39.38%, 9.92%, while, the corresponding conversion was 90.86% and 99.22%, which demonstrated the reduced model molecules were almost completely decomposed, indicating a catalytic reduction

efficiency matched the regulation of  $C_4H_8SH > C_2H_6SC_2H_6 > C_4H_8S$ . With respect to  $C_4H_4S$ , the removal rate was 9.77%, which was parallel with that of  $C_4H_8S$ , however, only 10.08% of the eliminated molecules was transformed to small ones, leaving 89.92% of complicated large S-containing compounds. Such a result indicated that  $C_4H_4S$  was much more difficult to be dissociated than  $C_4H_8S$ , which was coincident with the above theoretical conclusion. As a result, thiophene-structure molecules should be the most stable S-containing compounds. For this reason, it could be envisioned that removal of thiophene compounds was hard in aquathermolysis. Consequently, hydrogen donors usually were employed to promote the conversion of thiophenes to thiophanes, leading to an enhanced viscosity reduction during heavy oil catalytic aquathermolysis<sup>1-2</sup>

**Figure S5**

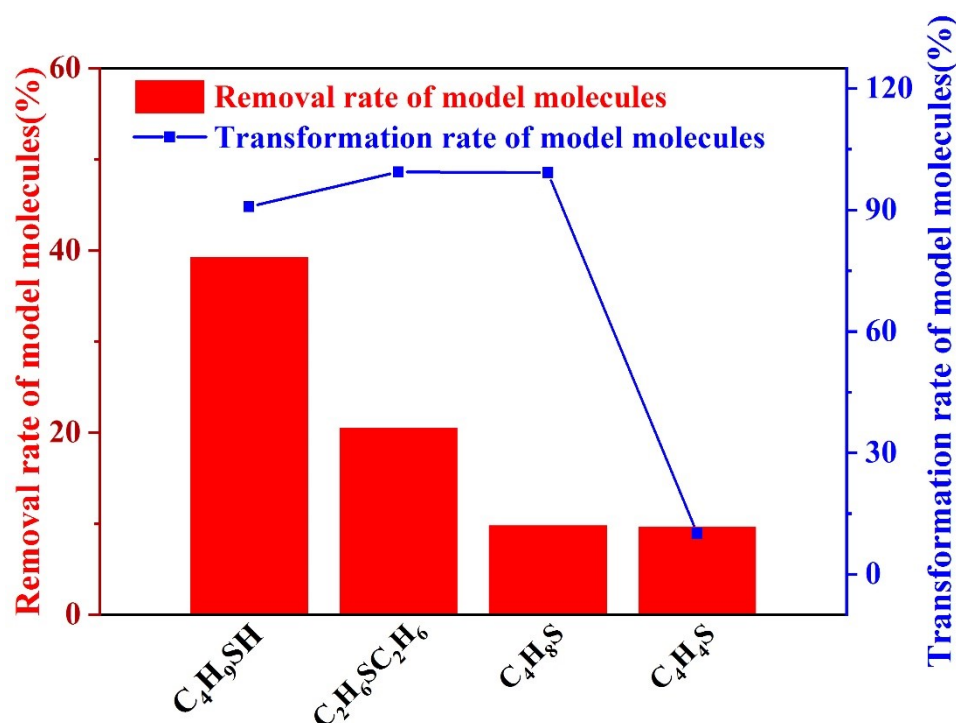

**Figure S5** Removal rate and transformation rate of  $C_4H_9SH$ ,  $C_2H_6SC_2H_6$ ,  $C_4H_8S$ ,  $C_4H_4S$  under equal reaction condition (30%  $H_2O$ , 200°C/12 h)

1. Hart, A.; Lewis, C.; White, T.; Greaves, M.; Wood, J., Effect of cyclohexane as hydrogen-donor in ultradispersed catalytic upgrading of heavy oil. *Fuel Processing Technology* **2015**, *138*, 724-733.
2. Yusuf, A.; Al-Hajri, R. S.; Al-Waheibi, Y. M.; Jibril, B. Y., In-situ upgrading of Omani heavy oil with catalyst and hydrogen donor. *Journal of Analytical and Applied Pyrolysis* **2016**, *121*, 102-112.
