# Supplementary material for: Desulfurization mechanism of thioether compounds in heavy oil on the (111) surface of inverse spinel Fe3O4
Source: Royal Society of Chemistry journal article supplement (doi:10.1039/d2cp02135h), 2022-01-01
Supplement: d2cp02135h2.pdf [file d2cp02135h2.pdf]

**Figure S1**

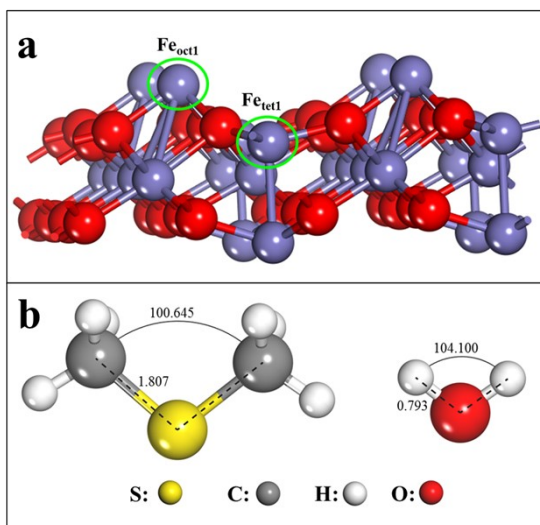

**Figure S1** Structure of optimized  $\text{Fe}_3\text{O}_4$  unit cell, dimethyl sulfide and water molecule models

**Figure S2**

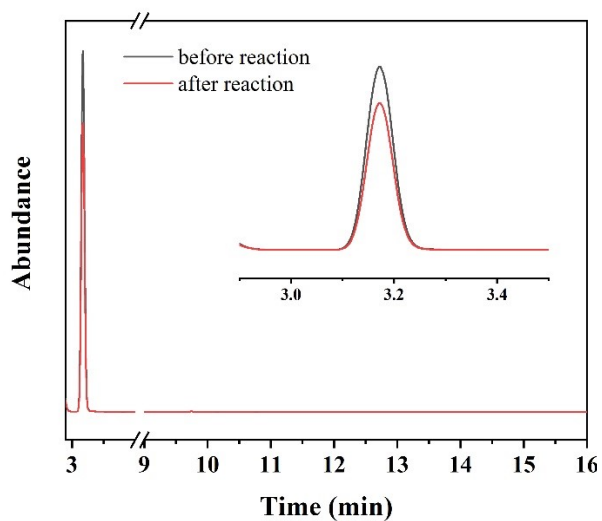

**Figure S2** GC-MS spectra of reaction system before and after catalytic reaction; inset shows the amplification of  $\text{C}_2\text{H}_6\text{SC}_2\text{H}_6$  species.

**Figure S3**

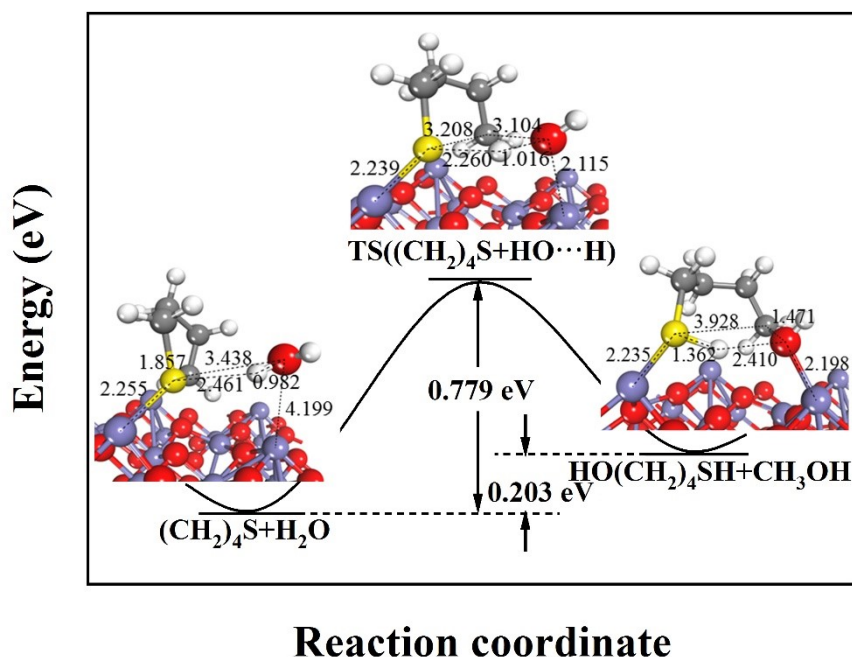

**Figure S3** The structure and energy variety of optimized  $\text{Fe}_3\text{O}_4$  (111) and  $\text{C}_4\text{H}_8\text{S}$  during catalytic reaction with assistance of free  $\text{H}_2\text{O}$  molecule

**Figure S4**

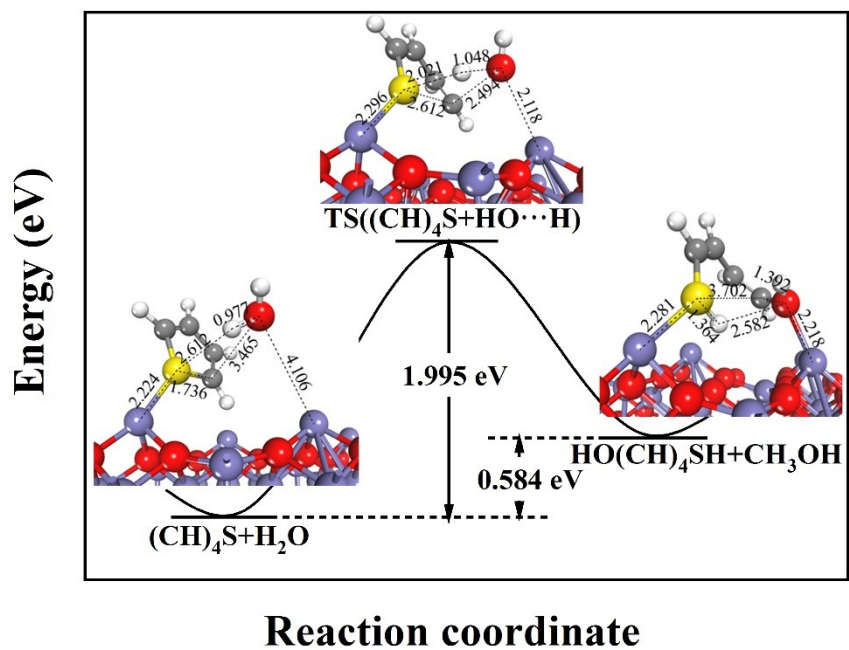

**Figure S4** The structure and energy variety of optimized  $\text{Fe}_3\text{O}_4$  (111) and  $\text{C}_4\text{H}_4\text{S}$  during catalytic reaction with assistance of free  $\text{H}_2\text{O}$  molecule

**Figure S5**

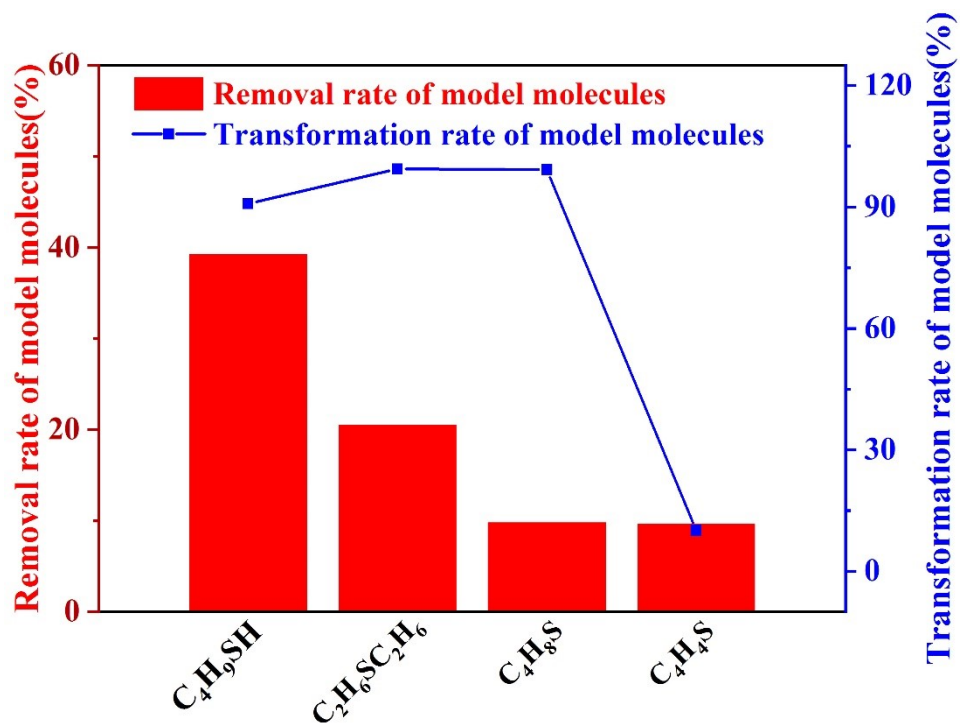

**Figure S5** Removal rate and transformation rate of  $C_4H_9SH$ ,  $C_2H_6SC_2H_6$ ,  $C_4H_8S$ ,  $C_4H_4S$  under equal reaction condition (30%  $H_2O$ , 200°C/12 h)
